# Supplementary material
Source: PubMed Central journal article supplement (PMC6120663)

## Table of Contents

|                         |     |
|-------------------------|-----|
| Appendix Figure legends | 2-3 |
| Appendix Figure S1      | 4   |
| Appendix Figure S2      | 5   |
| Appendix Figure S3      | 6   |

## Appendix Figure Legends

### Appendix Figure S1: *Cyr61<sup>eGFP</sup>* reporter specifically marks YAP-positive BCC tumors

A. *Cyr61<sup>eGFP</sup>* reporter activity in YAP-positive versus YAP-negative BCC tumors from *Yap<sup>fl/fl</sup>* (*Yap<sup>fl/fl</sup>:R26LSL-SmoM2/+;K14CreER:Cyr61<sup>eGFP</sup>*) mice. Purple arrows indicate YAP-positive BCC cells within a mosaic YAP expressing tumor; Yellow arrows indicate YAP-negative tumor clones or cells. Scale bar is 50 $\mu$ m.

### Appendix Figure S2: TAZ is expressed at low levels in epithelial BCC tumors and does not contribute to BCC growth *in vivo*.

- A. Validation of YAP and YAP/TAZ antibodies in adult epidermis from *TetOCre rtTA Yap<sup>fl/fl</sup>* mice. Low IHC signal with YAP/TAZ antibody is observed in basal keratinocytes (ear and tail). Scale bar is 50 $\mu$ m.
- B. Comparison of YAP and YAP/TAZ antibody staining pattern in serial sections from *Yap<sup>fl/fl</sup>* BCC. Scale bar is 100 $\mu$ m.
- C. qPCR analyses of Yap and Taz mRNA expression in FACS-sorted *Yap<sup>+/+</sup>* and *Yap<sup>fl/fl</sup>* ear BCC (6 weeks post tamoxifen).
- D. Representative H&E images of ear BCC (8 weeks post tamoxifen) from *Yap<sup>fl/fl</sup>* (*Yap<sup>fl/fl</sup> R26<sup>LSL-SmoM2/+</sup> K14CreER*) and *Yap<sup>fl/fl</sup> Taz<sup>fl/fl</sup>* (*Yap<sup>fl/fl</sup> Taz<sup>fl/fl</sup> R26<sup>LSL-SmoM2/+</sup> K14CreER*) mice. Scale bar is 100 $\mu$ m.
- E. Ear BCC clone size quantification 8 weeks post tamoxifen administration in *Yap<sup>fl/fl</sup>* and *Yap<sup>fl/fl</sup> Taz<sup>fl/fl</sup>* mice. n.s. – not significant.

### Appendix Figure S3. SmoM2-YFP and tdTomato expression overlaps in BCCs used for RNAseq analyses.

- A. Representative YFP (SmoM2-YFP) IF co-stained with tdTomato in BCC tumors ( $R26^{SmoM2YFP/tdTomato} K14CreER$ ) 6 weeks post high dose tamoxifen. Scale bar is 50 $\mu$ m. Approximately 96% (Of 1745 tdTomato positive cells counted, 1682 cells were also SmoM2-YFP positive) of tdTomato expressing cells also co-express SmoM2-YFP.
- B. Representative YAP IHC in ear and tail BCCs from  $Yap^{fl/fl}$  mice (6 post high dose tamoxifen). Ear epidermis has significantly higher  $Yap$  knockout efficiency compared tail epidermis (Ear = ~70%  $Yap$ -null BCCs; Tail = ~ 20%  $Yap$ -null BCCs).
- C. Representative YAP IF co-stained with GFP (SmoM2-YFP) in ear BCC from  $Yap^{fl/fl}$  mice (6 post high dose tamoxifen). White arrows indicate YAP-positive BCC clone.  $Yap$  knockout efficiency in SmoM2-YFP positive cells is approximately 70%.

**A**

*Yap<sup>fl/fl</sup> R26<sup>SmoM2</sup>YFP/+; Cyr61<sup>eGFP</sup>*

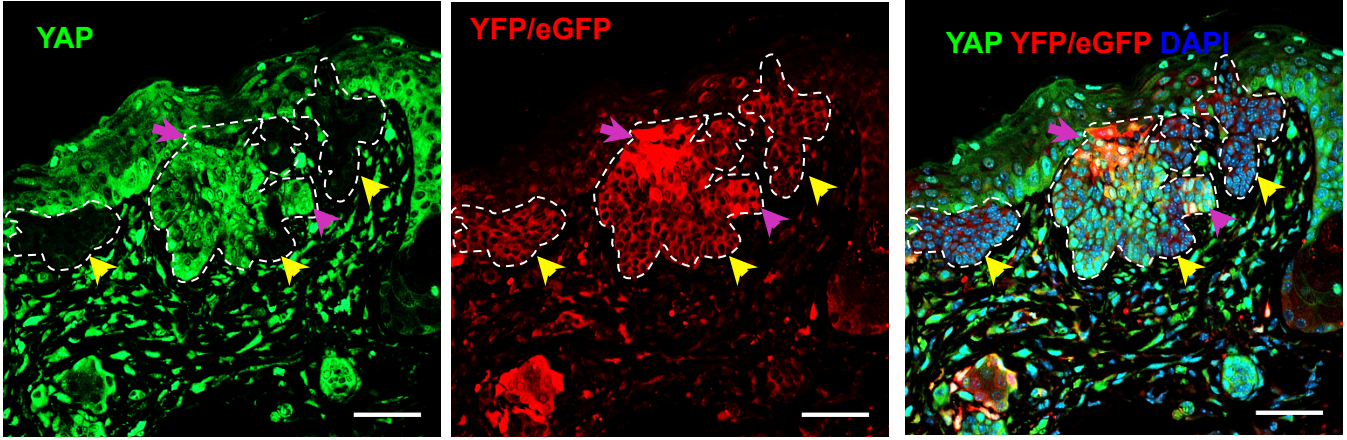

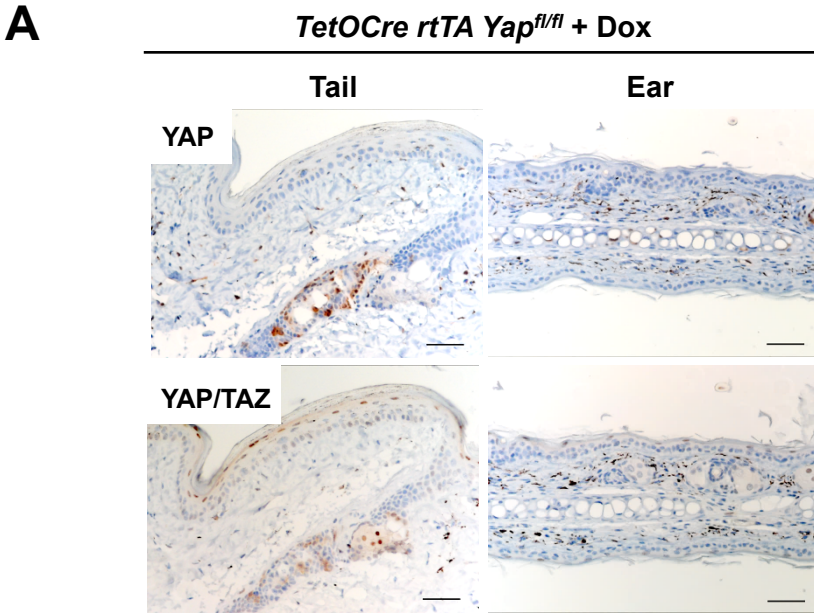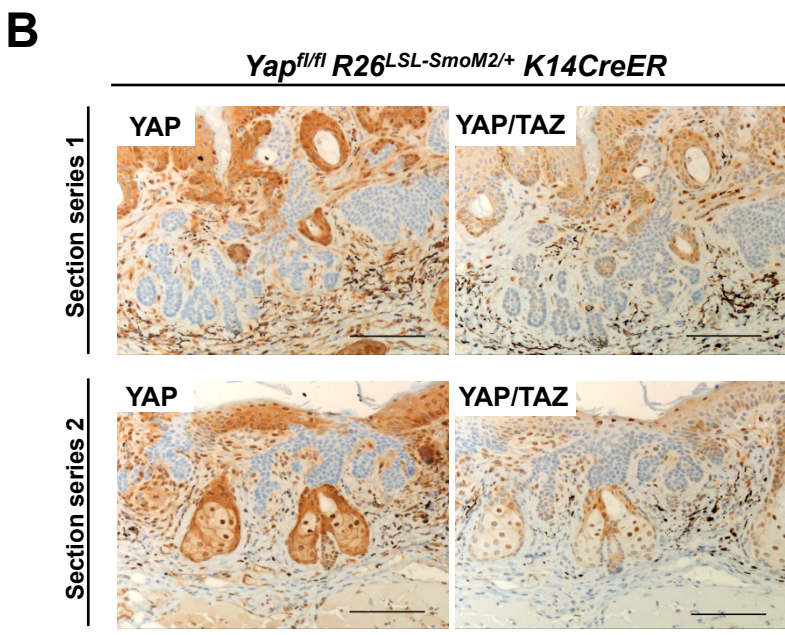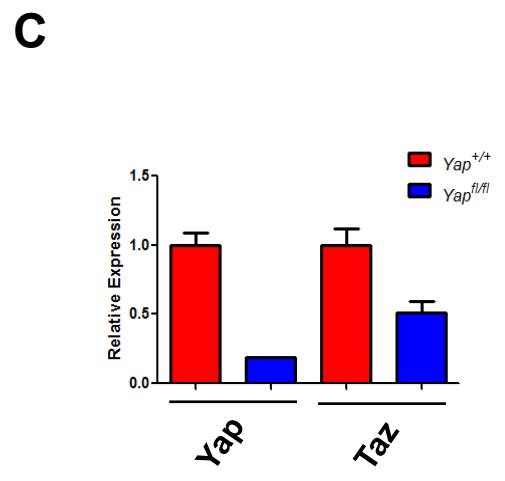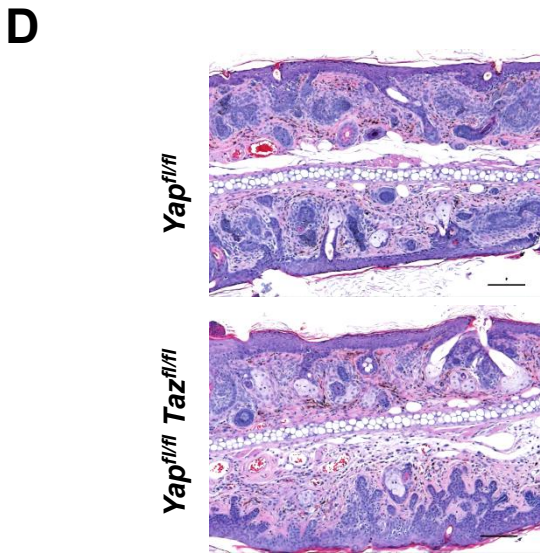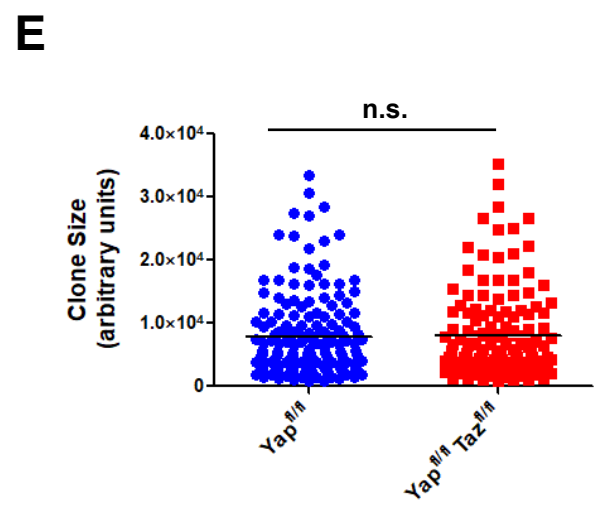

Appendix Figure S2

**A***R26<sup>SmoM2YFP/tdTomato</sup> K14CreER*  
(6 weeks post tamoxifen)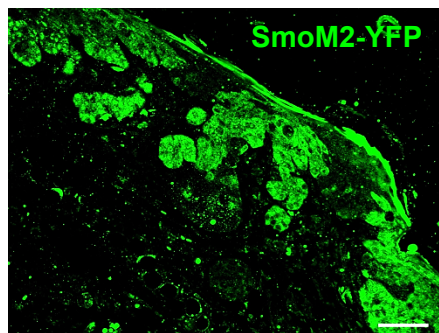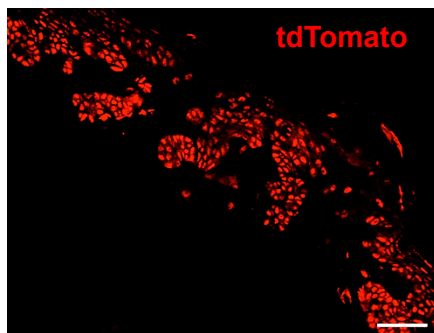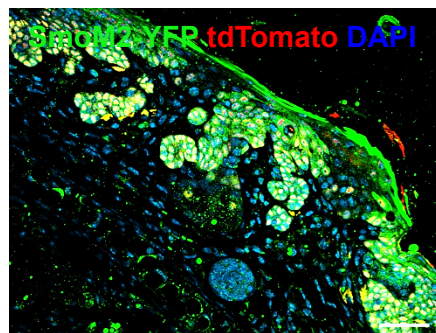**B***Yap<sup>fl/fl</sup>*  
(6 weeks post tamoxifen)

Ear

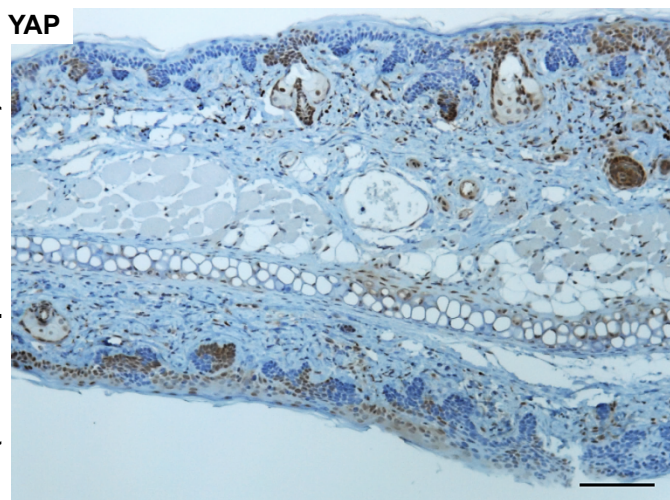

Tail

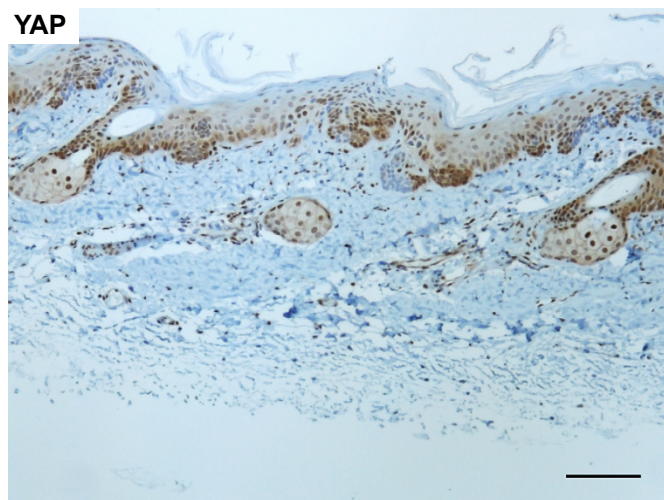**C***Yap<sup>fl/fl</sup>*  
(6 weeks post tamoxifen)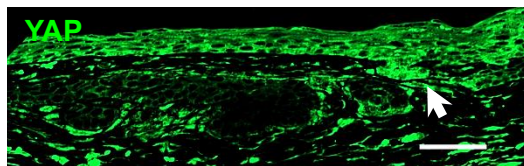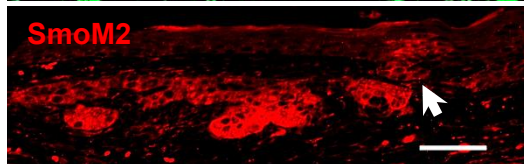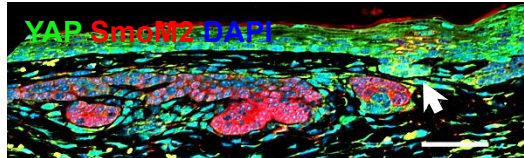

Supplement: EMBJ-37-e98642-s001.pdf [file EMBJ-37-e98642-s001.pdf]
